# Supplementary material for: Comprehensive Assessment of Indian Variations in the Druggable Kinome Landscape Highlights Distinct Insights at the Sequence, Structure and Pharmacogenomic Stratum
Source: Front Pharmacol. 2022 Jul 5;13:858345. doi: 10.3389/fphar.2022.858345 (PMC9294532; doi:10.3389/fphar.2022.858345)
Supplement: Supplementary file 4 [file Table12.xlsx]

## Sheet: Sheet1
Gene	Swiss-Prot_name	PDB_id	AA_AC	Change	Variant	Variation
CHUK	O15111	5TQY	VAR_021359	Polymorphism	rs2230804	V268I
CHUK	O15111	5TQY	VAR_040565	Polymorphism	rs34427437	S126C
CHUK	O15111	5TQY	VAR_040566	Polymorphism	rs2230803	V155A
EPHA7	Q15375	3NRU	VAR_022105	Polymorphism	rs2278107	I138V
EPHA7	Q15375	3NRU	VAR_022106	Polymorphism	rs2278106	P278S
EPHA7	Q15375	3NRU	VAR_036090	Unclassified	rs371089003	R371W
EPHA7	Q15375	3NRU	VAR_042150	Unclassified	-	E170K
EPHA7	Q15375	3NRU	VAR_042151	Unclassified	-	G232R
EPHA7	Q15375	3NRU	VAR_042152	Unclassified	-	P903S
GRK4	P32298	4YHJ	VAR_007806	Polymorphism	rs1140085	V247I
GRK4	P32298	4YHJ	VAR_024573	Polymorphism	rs2960306	R65L
GRK4	P32298	4YHJ	VAR_024574	Polymorphism	rs1024323	A142V
GRK4	P32298	4YHJ	VAR_024575	Polymorphism	rs1801058	V486A
GRK4	P32298	4YHJ	VAR_040516	Polymorphism	-	L425P
GRK4	P32298	4YHJ	VAR_046043	Polymorphism	rs34857805	A116T
GRK4	P32298	4YHJ	VAR_046044	Polymorphism	rs55852353	H383Q
GRK4	P32298	4YHJ	VAR_046045	Polymorphism	rs35024854	V473I
GRK4	P32298	4YHJ	VAR_046046	Polymorphism	rs35463176	A495T
GRK4	P32298	4YHJ	VAR_051621	Polymorphism	rs13305979	D95H
GRK4	P32298	4YHJ	VAR_051622	Polymorphism	rs45538934	T183R
GRK4	P32298	4YHJ	VAR_051623	Polymorphism	rs747003103	A440V
GRK5	P34947	4TNB	VAR_040517	Polymorphism	rs2230345	Q41L
GRK5	P34947	4TNB	VAR_040518	Polymorphism	rs55980792	A119V
GRK5	P34947	4TNB	VAR_040519	Polymorphism	rs55902633	G122S
GRK5	P34947	4TNB	VAR_040520	Polymorphism	rs34679178	T129M
GRK5	P34947	4TNB	VAR_040521	Polymorphism	rs56254855	L141I
GRK5	P34947	4TNB	VAR_040522	Unclassified	-	D163E
GRK5	P34947	4TNB	VAR_040523	Polymorphism	rs2230349	R304H
GRK6	P43250	3NYO	VAR_040524	Unclassified	rs141014084	R31Q
GRK6	P43250	3NYO	VAR_040525	Polymorphism	rs56382815	T73M
GRK6	P43250	3NYO	VAR_040526	Unclassified	-	I275M
IRAK1	P51617	6BFN	VAR_040573	Polymorphism	rs56340948	T398M
IRAK1	P51617	6BFN	VAR_040574	Unclassified	-	V412M
IRAK1	P51617	6BFN	VAR_040575	Unclassified	-	Q421H
IRAK1	P51617	6BFN	VAR_040576	Polymorphism	rs1059703	S532L
IRAK1	P51617	6BFN	VAR_040577	Polymorphism	rs34112487	G619S
IRAK1	P51617	6BFN	VAR_040578	Polymorphism	rs35638718	T625M
IRAK1	P51617	6BFN	VAR_040579	Polymorphism	rs56082801	R638W
IRAK1	P51617	6BFN	VAR_040580	Unclassified	-	S690G
IRAK1	P51617	6BFN	VAR_051629	Polymorphism	rs11465830	R194H
IRAK1	P51617	6BFN	VAR_051630	Polymorphism	rs1059702	F196S
IRAK1	P51617	6BFN	VAR_051631	Polymorphism	rs10127175	C203S
MAPK11	Q15759	3GC9	VAR_025176	Polymorphism	rs33932986	R275H
MAPK11	Q15759	3GC9	VAR_042264	Unclassified	-	A221V
MAPK13	O15264	4EYJ	VAR_042267	Polymorphism	rs55776345	S41L
MAPK13	O15264	4EYJ	VAR_042268	Polymorphism	rs55990045	A282V
MAPK13	O15264	4EYJ	VAR_042269	Polymorphism	rs41270090	A300T
PDK4	Q16654	3D2R	VAR_042298	Polymorphism	rs56391840	A17V
PDK4	Q16654	3D2R	VAR_042299	Polymorphism	rs55761955	L19M
PDK4	Q16654	3D2R	VAR_042300	Polymorphism	rs34898343	D109G
RET	P07949	6I83	VAR_006295	Disease	rs76764689	S32L
RET	P07949	6I83	VAR_006296	Disease	rs77596424	P64L
RET	P07949	6I83	VAR_006297	Unclassified	rs1477699803	G93S
RET	P07949	6I83	VAR_006298	Disease	-	C142S
RET	P07949	6I83	VAR_006299	Disease	rs79661516	R231H
RET	P07949	6I83	VAR_006300	Disease	rs562449603	E251K
RET	P07949	6I83	VAR_006301	Disease	-	R287Q
RET	P07949	6I83	VAR_006302	Disease	rs80236571	R330Q
RET	P07949	6I83	VAR_006303	Disease	rs78098482	F393L
RET	P07949	6I83	VAR_006304	Disease	rs1554818362	P399L
RET	P07949	6I83	VAR_006305	Disease	rs138624658	R475Q
RET	P07949	6I83	VAR_006306	Disease	rs77939446	C609Y
RET	P07949	6I83	VAR_006306	Disease	rs77939446	C609Y
RET	P07949	6I83	VAR_006306	Disease	rs77939446	C609Y
RET	P07949	6I83	VAR_006307	Disease	rs377767396	C609W
RET	P07949	6I83	VAR_006308	Disease	rs80069458	C611W
RET	P07949	6I83	VAR_006308	Disease	rs80069458	C611W
RET	P07949	6I83	VAR_006309	Disease	rs377767397	C611Y
RET	P07949	6I83	VAR_006310	Disease	rs76262710	C618G
RET	P07949	6I83	VAR_006311	Disease	rs76262710	C618R
RET	P07949	6I83	VAR_006311	Disease	rs76262710	C618R
RET	P07949	6I83	VAR_006311	Disease	rs76262710	C618R
RET	P07949	6I83	VAR_006312	Disease	rs79781594	C618F
RET	P07949	6I83	VAR_006312	Disease	rs79781594	C618F
RET	P07949	6I83	VAR_006313	Disease	rs79781594	C618S
RET	P07949	6I83	VAR_006313	Disease	rs79781594	C618S
RET	P07949	6I83	VAR_006313	Disease	rs79781594	C618S
RET	P07949	6I83	VAR_006314	Disease	rs79781594	C618Y
RET	P07949	6I83	VAR_006314	Disease	rs79781594	C618Y
RET	P07949	6I83	VAR_006315	Disease	rs77316810	C620G
RET	P07949	6I83	VAR_006315	Disease	rs77316810	C620G
RET	P07949	6I83	VAR_006316	Disease	rs77316810	C620R
RET	P07949	6I83	VAR_006316	Disease	rs77316810	C620R
RET	P07949	6I83	VAR_006316	Disease	rs77316810	C620R
RET	P07949	6I83	VAR_006317	Disease	rs77503355	C620S
RET	P07949	6I83	VAR_006317	Disease	rs77503355	C620S
RET	P07949	6I83	VAR_006318	Disease	rs77503355	C620F
RET	P07949	6I83	VAR_006318	Disease	rs77503355	C620F
RET	P07949	6I83	VAR_006319	Disease	rs77503355	C620Y
RET	P07949	6I83	VAR_006320	Disease	rs377767405	C630F
RET	P07949	6I83	VAR_006320	Disease	rs377767405	C630F
RET	P07949	6I83	VAR_006321	Unclassified	rs121913308	D631G
RET	P07949	6I83	VAR_006323	Disease	rs75076352	C634G
RET	P07949	6I83	VAR_006323	Disease	rs75076352	C634G
RET	P07949	6I83	VAR_006324	Disease	rs75996173	C634F
RET	P07949	6I83	VAR_006324	Disease	rs75996173	C634F
RET	P07949	6I83	VAR_006325	Disease	rs75996173	C634Y
RET	P07949	6I83	VAR_006325	Disease	rs75996173	C634Y
RET	P07949	6I83	VAR_006325	Disease	rs75996173	C634Y
RET	P07949	6I83	VAR_006326	Disease	rs75076352	C634R
RET	P07949	6I83	VAR_006326	Disease	rs75076352	C634R
RET	P07949	6I83	VAR_006326	Disease	rs75076352	C634R
RET	P07949	6I83	VAR_006327	Disease	rs75076352	C634S
RET	P07949	6I83	VAR_006327	Disease	rs75076352	C634S
RET	P07949	6I83	VAR_006327	Disease	rs75076352	C634S
RET	P07949	6I83	VAR_006328	Disease	rs77709286	C634W
RET	P07949	6I83	VAR_006328	Disease	rs77709286	C634W
RET	P07949	6I83	VAR_006328	Disease	rs77709286	C634W
RET	P07949	6I83	VAR_006331	Disease	-	S690P
RET	P07949	6I83	VAR_006332	Polymorphism	rs1799939	G691S
RET	P07949	6I83	VAR_006334	Disease	-	S767R
RET	P07949	6I83	VAR_006335	Disease	rs78014899	E768D
RET	P07949	6I83	VAR_006336	Disease	rs79658334	V804L
RET	P07949	6I83	VAR_006337	Disease	rs79658334	V804M
RET	P07949	6I83	VAR_006338	Disease	rs1451004715	R873Q
RET	P07949	6I83	VAR_006339	Disease	-	F893L
RET	P07949	6I83	VAR_006340	Disease	rs76087194	R897Q
RET	P07949	6I83	VAR_006341	Disease	rs377767430	K907E
RET	P07949	6I83	VAR_006342	Disease	rs74799832	M918T
RET	P07949	6I83	VAR_006342	Disease	rs74799832	M918T
RET	P07949	6I83	VAR_006343	Disease	-	E921K
RET	P07949	6I83	VAR_006345	Disease	-	T946M
RET	P07949	6I83	VAR_006345	Disease	-	T946M
RET	P07949	6I83	VAR_006346	Disease	rs76534745	R972G
RET	P07949	6I83	VAR_006347	Disease	-	P973L
RET	P07949	6I83	VAR_006348	Disease	-	M980T
RET	P07949	6I83	VAR_006349	Polymorphism	rs17158558	R982C
RET	P07949	6I83	VAR_008966	Polymorphism	rs377767393	R600Q
RET	P07949	6I83	VAR_009459	Disease	-	P20L
RET	P07949	6I83	VAR_009460	Disease	-	R77C
RET	P07949	6I83	VAR_009461	Unclassified	-	C157Y
RET	P07949	6I83	VAR_009462	Disease	-	F174S
RET	P07949	6I83	VAR_009463	Disease	-	R180P
RET	P07949	6I83	VAR_009464	Disease	-	C197Y
RET	P07949	6I83	VAR_009465	Disease	rs77702891	R313Q
RET	P07949	6I83	VAR_009466	Unclassified	-	N359K
RET	P07949	6I83	VAR_009467	Disease	-	R360W
RET	P07949	6I83	VAR_009468	Disease	-	N394K
RET	P07949	6I83	VAR_009470	Disease	rs77558292	C609G
RET	P07949	6I83	VAR_009471	Disease	rs77558292	C609R
RET	P07949	6I83	VAR_009472	Disease	rs377767391	C611G
RET	P07949	6I83	VAR_009473	Disease	rs377767391	C611R
RET	P07949	6I83	VAR_009474	Disease	rs377767391	C611S
RET	P07949	6I83	VAR_009475	Disease	rs79890926	C620W
RET	P07949	6I83	VAR_009475	Disease	rs79890926	C620W
RET	P07949	6I83	VAR_009476	Disease	rs1255575160	Q626K
RET	P07949	6I83	VAR_009477	Disease	rs377767405	C630S
RET	P07949	6I83	VAR_009478	Disease	rs377767405	C630Y
RET	P07949	6I83	VAR_009480	Disease	rs78935588	A640G
RET	P07949	6I83	VAR_009481	Disease	-	E762Q
RET	P07949	6I83	VAR_009482	Disease	rs75030001	L790F
RET	P07949	6I83	VAR_009482	Disease	rs75030001	L790F
RET	P07949	6I83	VAR_009483	Disease	rs77724903	Y791F
RET	P07949	6I83	VAR_009483	Disease	rs77724903	Y791F
RET	P07949	6I83	VAR_009483	Disease	rs77724903	Y791F
RET	P07949	6I83	VAR_009483	Disease	rs77724903	Y791F
RET	P07949	6I83	VAR_009484	Disease	rs1318733775	R813Q
RET	P07949	6I83	VAR_009485	Disease	rs377767429	A883F
RET	P07949	6I83	VAR_009486	Disease	rs75234356	S891A
RET	P07949	6I83	VAR_009487	Polymorphism	rs377767432	S922Y
RET	P07949	6I83	VAR_009488	Polymorphism	rs79853121	P1039Q
RET	P07949	6I83	VAR_009490	Disease	rs536486113	L1061P
RET	P07949	6I83	VAR_009491	Disease	rs149513065	M1064T
RET	P07949	6I83	VAR_009492	Disease	-	L40P
RET	P07949	6I83	VAR_009493	Disease	rs75075748	S765P
RET	P07949	6I83	VAR_011582	Disease	rs55947360	R844L
RET	P07949	6I83	VAR_012743	Disease	-	A639G
RET	P07949	6I83	VAR_012744	Disease	-	A641G
RET	P07949	6I83	VAR_012745	Disease	rs377767432	S922F
RET	P07949	6I83	VAR_018153	Disease	rs192489011	R67H
RET	P07949	6I83	VAR_018154	Disease	rs76397662	R114H
RET	P07949	6I83	VAR_018154	Disease	rs76397662	R114H
RET	P07949	6I83	VAR_018155	Disease	rs552057730	A432E
RET	P07949	6I83	VAR_018156	Polymorphism	rs9282834	D489N
RET	P07949	6I83	VAR_018157	Disease	rs79853121	P1039L
RET	P07949	6I83	VAR_035711	Disease	-	V145G
RET	P07949	6I83	VAR_035712	Unclassified	-	G593E
RET	P07949	6I83	VAR_041762	Unclassified	rs149403911	R163Q
RET	P07949	6I83	VAR_041763	Polymorphism	rs35118262	T278N
RET	P07949	6I83	VAR_041764	Unclassified	rs34682185	V292M
RET	P07949	6I83	VAR_041765	Polymorphism	rs34288963	R749T
RET	P07949	6I83	VAR_041766	Polymorphism	rs34617196	Y826S
RET	P07949	6I83	VAR_041767	Unclassified	-	F1112Y
RET	P07949	6I83	VAR_044392	Unclassified	rs76736111	P198T
RET	P07949	6I83	VAR_044393	Unclassified	-	V376A
RET	P07949	6I83	VAR_044394	Unclassified	-	N394H
RET	P07949	6I83	VAR_044395	Unclassified	rs75686697	V778I
RET	P07949	6I83	VAR_044396	Unclassified	-	G894S
RET	P07949	6I83	VAR_044397	Unclassified	rs1490712863	P1049L
RET	P07949	6I83	VAR_044398	Unclassified	rs775583354	P1067S
RET	P07949	6I83	VAR_067101	Disease	rs747483905	R114C
RET	P07949	6I83	VAR_067102	Disease	-	P155L
RET	P07949	6I83	VAR_067103	Disease	-	R175P
RET	P07949	6I83	VAR_067104	Disease	rs541929171	T278A
RET	P07949	6I83	VAR_067105	Disease	-	T278P
RET	P07949	6I83	VAR_067106	Disease	-	D300N
RET	P07949	6I83	VAR_067107	Disease	rs1060499894	S316I
RET	P07949	6I83	VAR_067108	Disease	rs774829203	S339L
RET	P07949	6I83	VAR_067109	Disease	-	D353Y
RET	P07949	6I83	VAR_067110	Disease	rs762472027	R360Q
RET	P07949	6I83	VAR_067111	Disease	rs183729115	V397M
RET	P07949	6I83	VAR_067112	Disease	rs746970700	V412M
RET	P07949	6I83	VAR_067113	Disease	rs767601598	G423R
RET	P07949	6I83	VAR_067114	Disease	rs537874538	E480K
RET	P07949	6I83	VAR_067116	Disease	rs1483605155	E595Q
RET	P07949	6I83	VAR_067117	Disease	-	P679L
RET	P07949	6I83	VAR_067118	Disease	rs141185224	R694Q
RET	P07949	6I83	VAR_067119	Disease	rs587778656	N783S
RET	P07949	6I83	VAR_067120	Disease	rs200127630	G830R
RET	P07949	6I83	VAR_067121	Disease	-	K907T
RET	P07949	6I83	VAR_067122	Disease	-	F961L
RET	P07949	6I83	VAR_067123	Disease	-	L1052V
RET	P07949	6I83	VAR_067124	Disease	rs587778659	Y1062C
TAOK3	Q9H2K8	6BDN	VAR_023691	Polymorphism	rs428073	S47N
TAOK3	Q9H2K8	6BDN	VAR_041205	Unclassified	-	P20T
TAOK3	Q9H2K8	6BDN	VAR_041206	Unclassified	-	S392Y
TAOK3	Q9H2K8	6BDN	VAR_041207	Polymorphism	rs55857273	C727Y
